# Supplementary material
Source: PubMed Central journal article supplement (PMC4943387)
Supplement: supp_the2015-0420_Supplemental_Table.pdf [file supp_the2015-0420_Supplemental_Table.pdf]

Supplemental Table for:  
 Efficacy and Safety of Everolimus in Extra-Pancreatic NET: A Comprehensive Review of Literature  
 Pasqualino Malandrino et al.

**Table S1. Treatments before everolimus in NET patients.**

| Surgery  | Chemotherapy | SSA       | Interferon | TKI      | LRT      | PRRT      | Radiotherapy |
|----------|--------------|-----------|------------|----------|----------|-----------|--------------|
| NA       | 8 (36%)      | 18 (82%)  | 4 (18%)    | 13 (59%) | 5 (23%)  | 0         | 0            |
| NA       | NS           | NS        | 0          | NS       | NS       | 0         | 0            |
| NA       | 25 (42%)     | 38 (63%)  | 9 (15%)    | 6 (10%)  | 5 (8%)   | 0         | 0            |
| NA       | 25 (73%)     | 0         | 0          | 0        | 0        | 0         | 9 (26%)      |
| 27 (68%) | 9 (22%)      | 0         | 0          | 1 (2%)   | 0        | 0         | 6 (15%)      |
| 25 (50%) | 0            | 0         | 0          | 0        | 0        | 0         | 0            |
| NA       | 75 (35%)     | 173 (84%) | NA         | 0        | NA       | 0         | 0            |
| NA       | 7 (37%)      | 13 (68%)  | 0          | 0        | 0        | 0         | 0            |
| NA       | 13 (39%)     | 22 (67%)  | 0          | 5 (15%)  | 0        | 0         | 0            |
| 7 (50%)  | 2 (14%)      | 1 (7%)    | 2 (14%)    | 1 (7%)   | 0        | 1 (7%)    | 3 (21%)      |
| 11 (46%) | 8 (33%)      | 14 (58%)  | 1 (4%)     | 0        | 0        | 24 (100%) | 0            |
| NS       | 84 (50%)     | 157 (93%) | 18 (11%)   | 0        | NA       | 85 (50%)  | 0            |
| 1 (100%) | 0            | 1 (100%)  | 1 (100%)   | 0        | 1 (100%) | 0         | 0            |
| 1 (100%) | 1 (100%)     | 1 (100%)  | 0          | 0        | 0        | 0         | 1            |
| 1 (100%) | 1 (100%)     | 1 (100%)  | 1 (100%)   | 0        | 0        | 0         | 0            |
| 2 (100%) | 0            | 2 (100%)  | 0          | 0        | 0        | 1 (50%)   | 1 (50%)      |
| 1 (100%) | 0            | 0         | 0          | 0        | 0        | 0         | 0            |
| 0        | 1 (100%)     | 1 (100%)  | 0          | 0        | 0        | 0         | 0            |
| 1 (100%) | 0            | 1 (100%)  | 0          | 0        | 1 (100%) | 1 (100%)  | 0            |
| 1 (100%) | 0            | 1 (100%)  | 0          | 0        | 0        | 0         | 0            |
| NA       | NA           | NA        | NA         | 0        | NA       | 0         | 0            |
| 1 (100%) | 0            | 1 (100%)  | 0          | 0        | 1        | 0         | 0            |

Supplemental Table for:  
Efficacy and Safety of Everolimus in Extra-Pancreatic NET: A Comprehensive Review of Literature  
Pasqualino Malandrino et al.

NA: not available
